# Supplementary material for: Physics-Guided Generative Inverse Design of Thermally Anisotropic Microstructures via FEM-Validated Conditional GANs
Source: Research Square preprint supplement (doi:10.21203/rs.3.rs-8703736/v1), 2026-02-10
Supplement: Supplementary file 1 [file 60d0fa171359fc21d7ac5376.docx]

This Supplementary Information provides additional methodological and implementation details supporting the results presented in the main manuscript. It includes the formulation of the finite element method (FEM) simulations used for physics-based data generation, details of dataset construction and sampling strategies, and the architecture and training procedure of the conditional generative adversarial network (GAN). These materials are provided to ensure transparency and reproducibility, while the main text focuses on the physical motivation, conceptual framework, and validation of the proposed physics-guided inverse design approach.

# ****FEM-Based Thermal Data Generation Using FEniCS****

The training data used in this study were generated entirely through physics-based simulations using the finite element method (FEM). All thermal simulations were implemented in Python using the open-source FEniCS framework, which provides a flexible and reliable platform for solving partial differential equations using variational formulations.

## ****Governing Equation****

The effective thermal conductivity of each microstructure was computed by solving the steady-state heat conduction equation in the absence of internal heat sources. The governing equation is given by

(1)

where is the temperature field, is the spatially varying thermal conductivity, and denotes the computational domain. The domain consists of a solid matrix containing elliptical pores, which are modeled as regions with negligible thermal conductivity relative to the solid phase.

## ****Boundary Conditions for Directional Conductivity****

To compute the effective thermal conductivity along a given direction, Dirichlet boundary conditions were imposed to enforce a unit temperature gradient across the domain. For the computation of the effective conductivity in the -direction, the following boundary conditions were applied:

where and denote the left and right boundaries of the domain, respectively, and and denote the bottom and top boundaries. The Neumann boundary conditions on the remaining boundaries ensure that heat flows predominantly along the -direction.

An analogous set of boundary conditions was applied to compute the effective thermal conductivity in the -direction by exchanging the roles of the - and -boundaries.

## ****Weak Formulation****

To solve the governing equation numerically, the strong form was converted into a weak (variational) form. Let denote the space of admissible trial and test functions satisfying the prescribed Dirichlet boundary conditions. Multiplying the governing equation by a test function and integrating over the domain yields

(3)

Applying integration by parts and incorporating the Neumann boundary conditions leads to the weak form:

(4)

This variational problem was discretized using continuous Lagrange finite elements and solved using FEniCS’s built-in linear solvers.

## **Mesh Generation and Geometry Representation**

The computational domain corresponds to a square region discretized into triangular finite elements. Microstructural geometry, including the location, size, and orientation of elliptical pores, was generated programmatically and meshed using Gmsh. The resulting meshes were imported into FEniCS using meshio, ensuring compatibility between geometry generation and FEM simulation.

Pores were treated as regions of very low thermal conductivity to approximate voids while maintaining numerical stability. This approach avoids the need for remeshing at pore boundaries and ensures a continuous finite element formulation across the domain.

## ****Computation of Effective Thermal Conductivity****

Once the temperature field was obtained, the effective thermal conductivity was computed by averaging the heat flux over the domain. For example, the effective conductivity in the -direction was calculated as

where the applied temperature difference is unity and the domain length is normalized. A similar expression was used to compute for the -direction.

This procedure ensures that the effective thermal conductivities reflect the true microstructure-dependent heat transport behavior rather than relying on empirical homogenization assumptions.

## ****Dataset Generation Workflow****

For each generated microstructure, two independent FEM simulations were performed to compute and . The resulting conductivity pair was then associated with the corresponding microstructure image and used as a label for GAN training. This workflow was repeated to generate large datasets for each pore-count configuration, providing a physics-consistent foundation for inverse design.

## Numerical Verification and Mesh Convergence

To ensure numerical accuracy, mesh convergence studies were performed on representative microstructures with varying pore sizes and anisotropy levels. The effective thermal conductivities were computed using progressively refined meshes until relative changes in and fell below 1%.

All simulations used mesh resolutions that satisfied this convergence criterion. This verification ensures that the reported conductivity values reflect true microstructural effects rather than numerical artifacts.

## FEM Data Generation Workflow (Pseudo-Code)

The FEM data generation process can be summarized as follows:

for each pore_count in {1, 2, 4, 8}:

for each microstructure sample:

generate elliptical pore geometry

generate FEM mesh

assign spatially varying conductivity k(x)

# x-direction conductivity

apply x-direction boundary conditions

solve weak form for temperature T_x

compute kx_eff

# y-direction conductivity

apply y-direction boundary conditions

solve weak form for temperature T_y

compute ky_eff

store (image, kx_eff, ky_eff)

This workflow was repeated to generate large datasets for each pore-count configuration, producing a physics-consistent foundation for GAN training.

# Architecture of RCWGAN-GP

## Regression-based, conditional, Wasserstein GAN with gradient penalty (RCWGAN-GP)

The conditional generative adversarial network (CGAN) consists of a discriminator and a generator and trains them to play a minimax game described by the following objective function:

where represents a microstructure image, is the processing parameter or condition, means the conditional distribution of is , resembled by the collected experimental data, is a random seed drawn from a multivariant Gaussian distribution, is the validity score produced by the discriminator using and as inputs, is a generated microstructure image produced by the generator from the random seed and the condition.

Once the CGAN is well-trained, the generated microstructural images follows a distribution that is close to the real distribution . Suppose a microstructure feature (e.g. porosity) can be quantified from a microstructure image using a pre-defined measurement .

MF is the microstructure feature.

The relationship between the microstructure feature and the processing parameter can be written as:

Since the real microstructure distribution can be well approximated using , the relationship between the microstructure feature and the processing parameter can also be approximated as:

Or empirically:

This means that for an arbitrary processing parameter y, the microstructure feature can be calculated by sampling N random seeds, using the generator to produce N microstructural images, and measuring them. Thus, we can call CGAN regression-based CGAN (RCGAN) if we predict the microstructure from an arbitrary condition.

We can improve the performance of RCGAN with the Wasserstein loss function. The improved algorithm is known as regression-based, conditional Wasserstein GAN (RCWGAN). Significant improvement was found for RCWGAN in microstructure predictions as shown in our previous study [18]. The microstructural features of grains and pores can be observed in the synthesized SEM micrographs. However, the grain boundaries and 3D configuration of the grains were still unclear. The regenerated microstructures had larger apparent average particle size than the real SEM. These defects might originate from the weight-clipping technique used in the RCWGAN. Finally, we replaced weight clipping with gradient penalty and developed an RCWGAN-GP algorithm for our simulation and prediction.

## Architecture of RCWGAN-GP, RCWGAN-GP-W

Residual blocks are the foundation of our generator and discriminator. These blocks take in an input, pass it through convolutional, normalization, and LeakyReLU layers. The LeakyReLU function is defined as:

(11)

where was set to be 0.2.

Finally, residual blocks add the input to the processed layers and return the combined output. This preserves the input and preserves information in a large network. The architecture of the residual block can be seen in **Figure S1**.


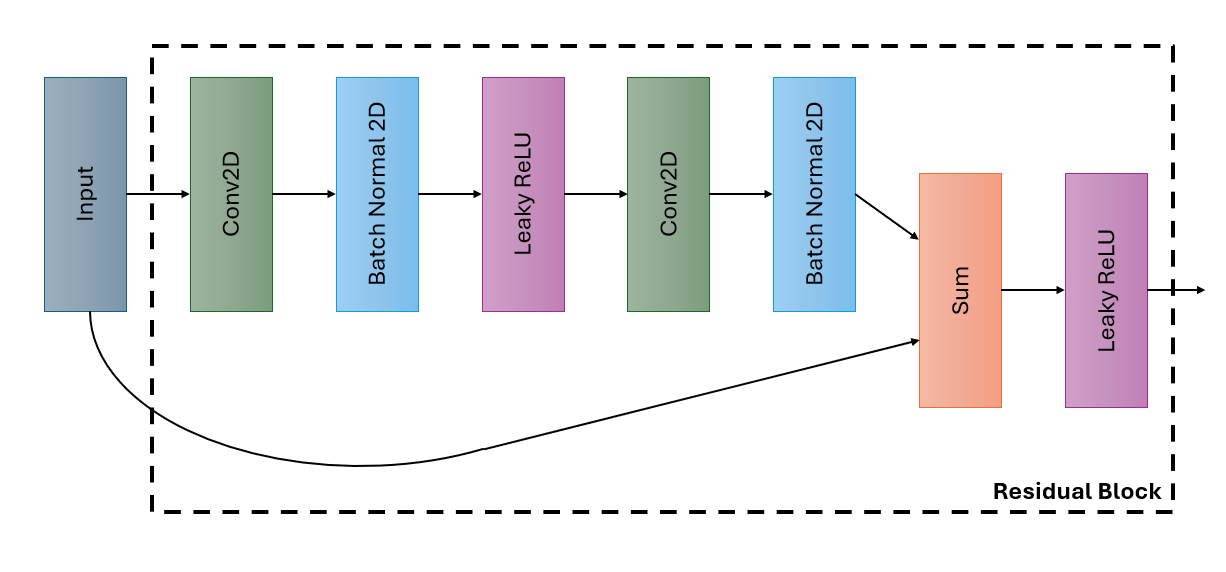


***Figure S1.*** *The architecture of a residual block in an RCWGAN-GP. The input is reinforced by being added to the output. This prevents “memory loss” in large networks.*

The architecture of the generator in our RCWGAN-GP algorithm is shown in ***Figure S2***. The generator first processes three inputs **(*Figure S2a*).** One was a random vector used as a seed for image generation. The other two were directional thermal conductivities. In the generator, the seed was expanded by a dense layer and then reshaped into 1 × 512. Each conductivity input was also expanded into 1 × 512 layers. Then they were concatenated together and reshaped to 1024 × 8 × 8. The simple sequential component of the generator is shown in ***Figure S2b***, consisting of a convolutional, normalization, and LeakyReLU layer, followed by 4 residual blocks. The first Conv2D layer in each sequential component resizes the image (*e.g.*, 1024 × 8 × 8 to 512 × 16 × 16). The full generator architecture (***Figure S2c***) consists of 4 sequential components, resizing the image to 64 × 128 × 128, a partial sequential component (32 × 128 ×128), and a final convolutional layer and a hyperbolic tangent to resize and normalize the image to 1 × 128 × 128 between 0 and 1, as desired.


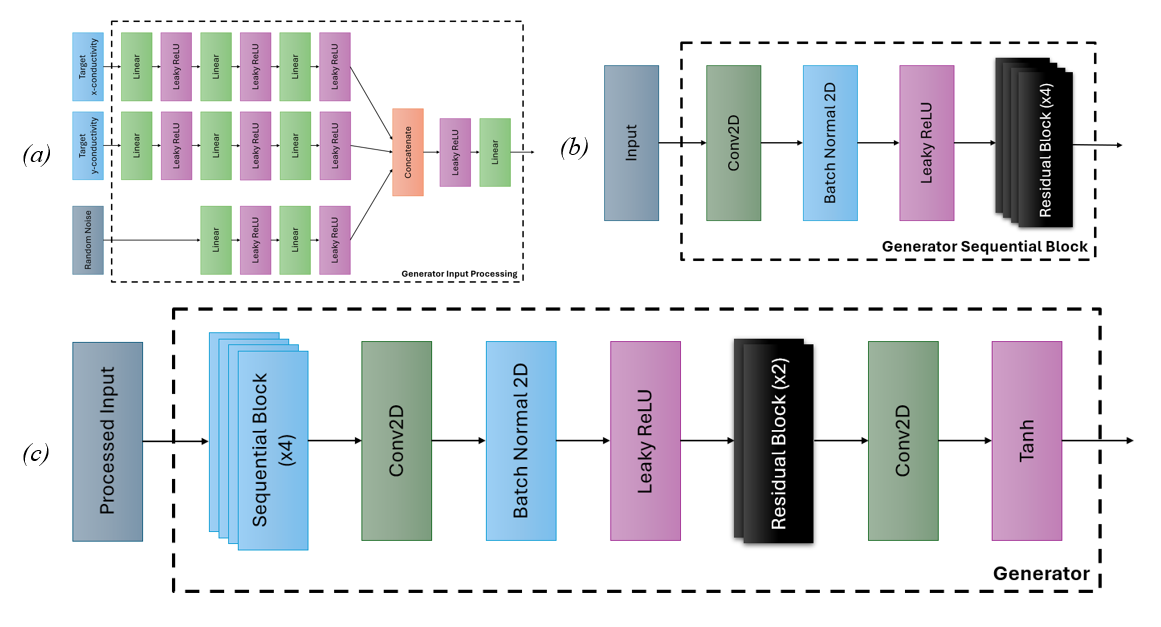


***Figure S2.*** *The generator model architecture consists of input processing (a), resizing sequential blocks (b), put together into the full model (c). The processed input is slowly expanded with convolutional layers until it is a 128 × 128 image.*

The architecture of our discriminator (***Figure S3***) is very similar to that of the generator. The initial input processing takes in the image (1 × 128 × 128), and the two target thermal conductivities (***Figure S3a***). The image is doubled, giving a tensor of size 2 × 128 × 128. The two target thermal conductivities are expanded in a sequence of convolutional and LeakyReLU layers, followed by a hyperbolic tangent, resizing their shapes to 1 × 128 × 128 each. Then, the image and two conductivities are concatenated to form a tensor of size 4 × 128 × 128. The simple sequential block in the discriminator is similar to that of the generator (***Figure S3b***), but through downsizing the image rather than expanding it through convolutional layers (e.g. 4 × 128 × 128 to 32 × 64 × 64). The full discriminator structure is shown in ***Figure S3c***. The sequential blocks reduce the size to 256 × 8 × 8. The final convolutional layer compresses this into a 1 × 1 tensor.


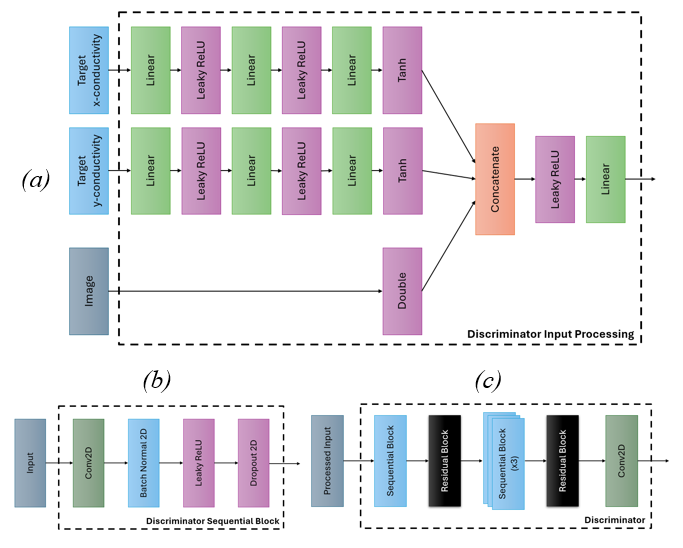


***Figure S3.*** *The discriminator model architecture consists of input processing (a) and downsizing sequential blocks (b), put together into the full model (c). The processed input is slowly reduced with convolutional layers until it is a 1 × 1 output.*

In total, the generator and discriminator in RCWGAN-GP owned 2,842,785 parameters and 3,323,369 parameters, respectively.

## 4.3 Microstructure Evaluation

Each GAN was trained over a course of 1000 epochs. After each epoch, the model was saved and microstructures based on randomized conductivities were generated. These were evaluated through the training data simulation process using FEniCS. A score is given based on the average error (in the x and y direction) for the model. At the end of the training, the model that performed the best was used for further image analysis.

The Python library skimage was used to identify regions (holes) in the microstructure. More specifically, the library offered functions that returned the number of holes, the dimensions of the hole, and the orientation of the holes. To calculate the ellipticity of a hole, we used this formula: , where E denotes the ellipticity, a and b are the major and minor axis respectively, and A represents the area of black pixels in the hole. The ellipticity of an image was the average of the ellipticities of the holes inside it.

For determine the orientations of holes inside an image, we used the cv2 library in Python to find the best-fit elliptical contours around each hole, which also returns the angle of the contour. Then, we can calculate statistical measures for the list of angles for each picture, including mean and standard deviation.
